# Supplementary material for: Suppression of energy dissipation and enhancement of breakdown strength in ferroelectric polymer–graphene percolative composites
Source: Royal Society of Chemistry journal article supplement (doi:10.1039/c3tc31556h), 2013-01-01
Supplement: c3tc31556h.pdf [file c3tc31556h.pdf]

Electronic Supplementary Information

*for*

**Suppression of Energy Dissipation and Enhancement of Breakdown Strength in Ferroelectric Polymer-Graphene Percolative Composites**

**Kuo Han,<sup>a,#</sup> Qi Li,<sup>a,b,#</sup> Zongyi Chen,<sup>b</sup> Matthew R. Gadinski,<sup>a</sup> Lijie Dong,<sup>b</sup>  
Chuanxin Xiong,<sup>b</sup> and Qing Wang<sup>a</sup>**

<sup>a</sup> Department of Materials Science and Engineering, The Pennsylvania State University, University Park, Pennsylvania, 16802, USA

<sup>b</sup> State Key Laboratory of Advanced Technology for Materials Synthesis and Processing, and School of Materials Science and Engineering, Wuhan University of Technology, Wuhan 430070, People's Republic of China

<sup>#</sup> These authors contributed equally to this work.

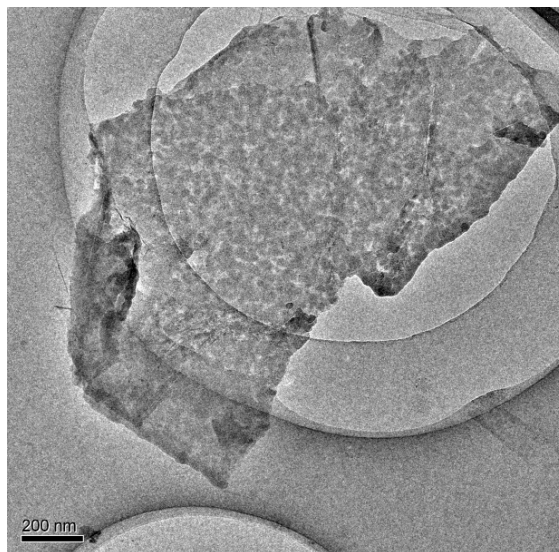

**Fig.S1** TEM image of GO@SiO<sub>2</sub>.

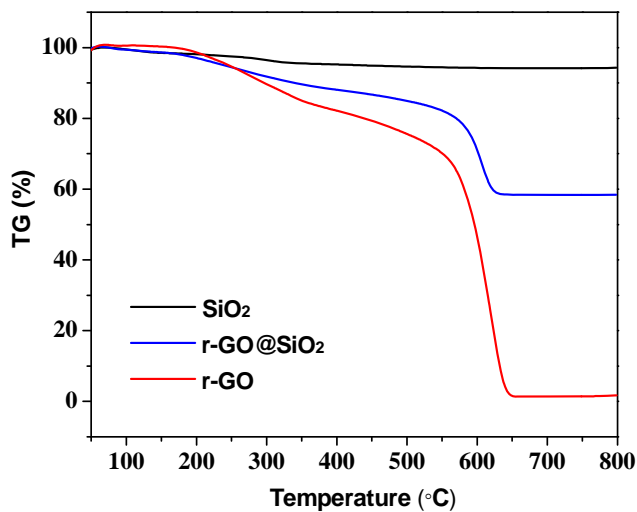

**Fig.S2** TGA trace of SiO<sub>2</sub>, r-GO@SiO<sub>2</sub> and r-GO.

**Tab.S1** Atomic ratio of C, O, and Si elements in r-GO@SiO<sub>2</sub>.

| Element          | C    | O    | Si   |
|------------------|------|------|------|
| Atomic ratio (%) | 48.0 | 36.7 | 15.3 |

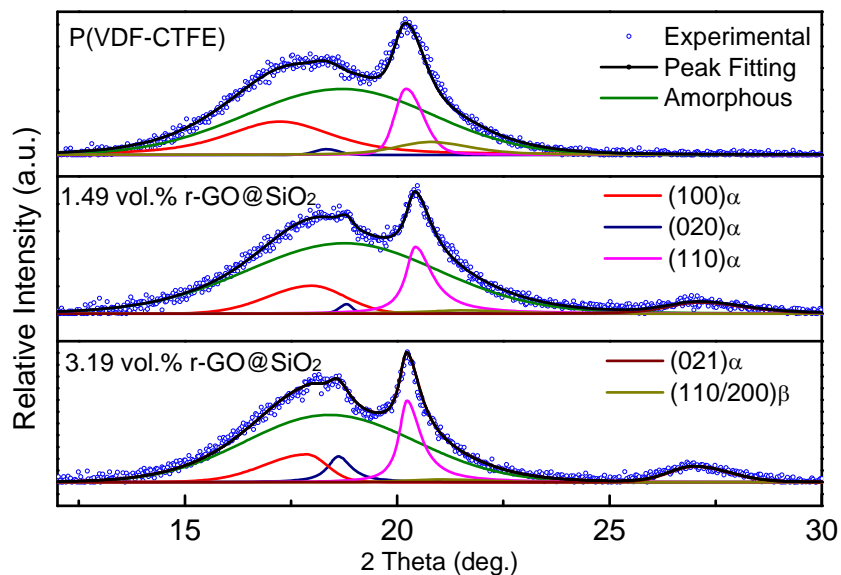

**Fig.S3** XRD profiles of pure PVDF-CTFE, 1.49 vol.% r-GO@SiO<sub>2</sub> and 3.19 vol.% r-GO@SiO<sub>2</sub>.

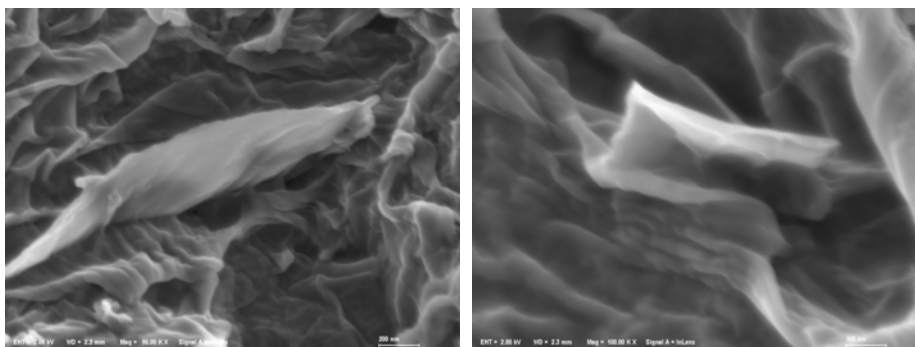

**Fig.S4** SEM images of the fracture surface of the r-GO@SiO<sub>2</sub>/P(VDF-CTFE) composite film. Scale bar: left: 200 nm, right: 100 nm.

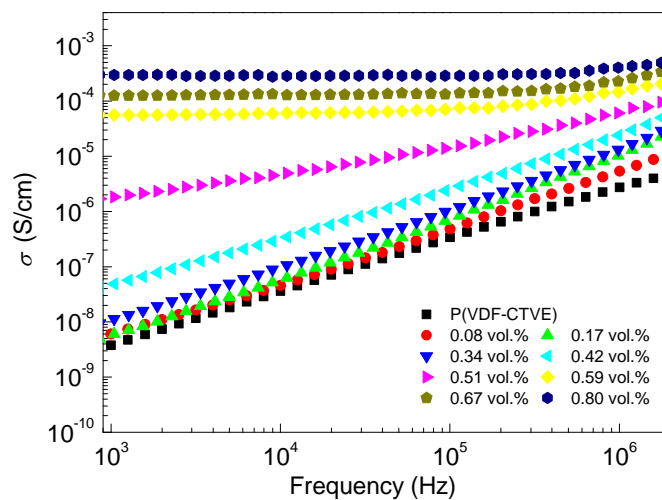

**Fig.S5** Dependence of electrical conductivity of r-GO/P(VDF-CTFE) films on frequency.

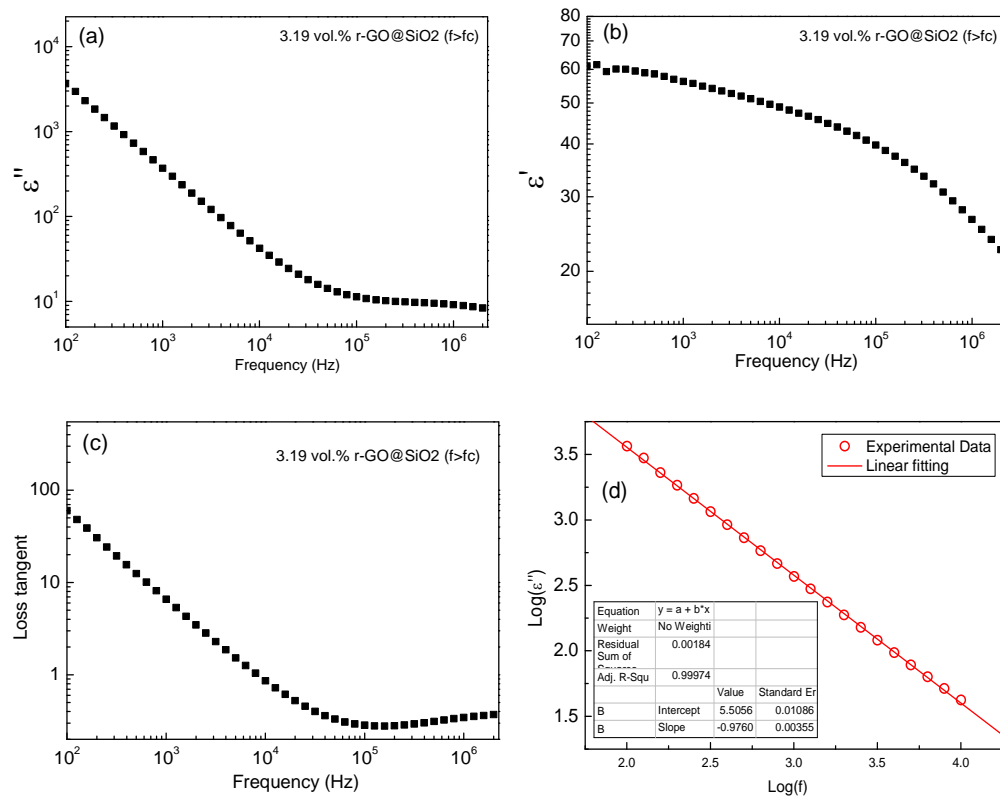

**Fig.S6** Dependence of (a) imaginary part, (b) real part of dielectric permittivity and (c) loss tangent of r-GO/P(VDF-CTFE) on frequency. (d) Linear fitting of imaginary part of dielectric permittivity as a function of frequency, showing a slope very close to -1.

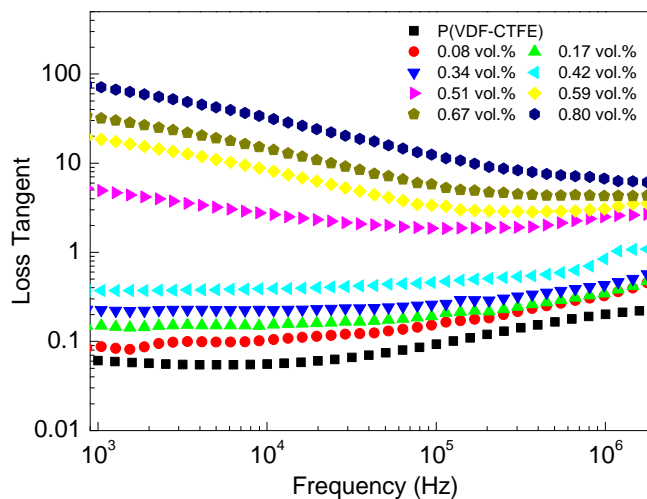

**Fig.S7** Dependence of loss tangent of r-GO/P(VDF-CTFE) films on frequency.

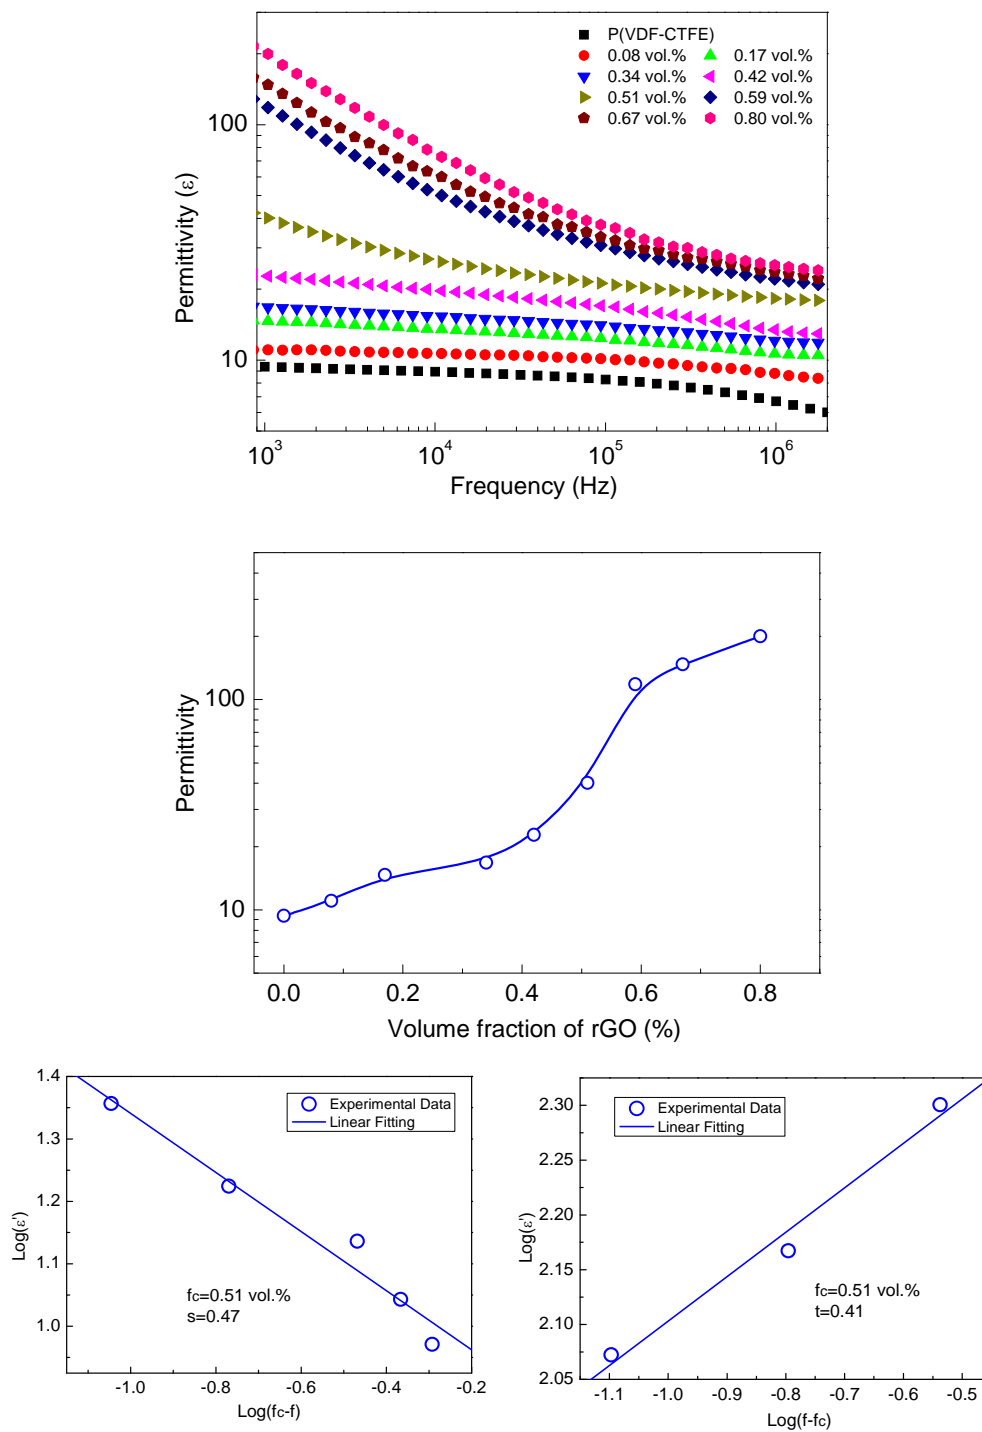

**Fig.S8** Dependence of permittivity of r-GO/P(VDF-CTFE) composites on (a) the frequency and (b) the r-GO content at 1 KHz.
